# Supplementary material
Source: PubMed Central journal article supplement (PMC1253544)

A

|         |   |   |   |   |   |   |
|---------|---|---|---|---|---|---|
| Mirror  | - | + | + | - | + | + |
| FLAG-ab | - | - | + | - | - | + |

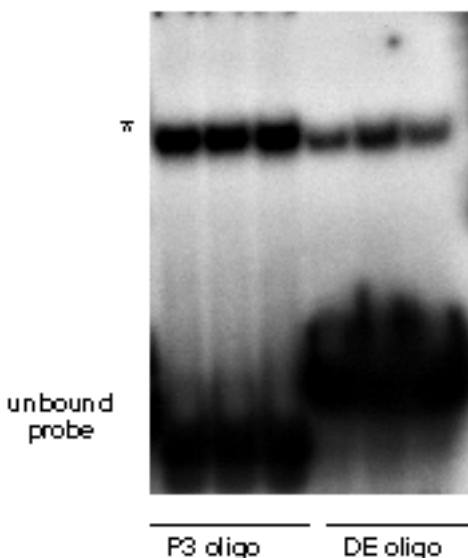

B

|         |   |   |   |   |
|---------|---|---|---|---|
| Mirr    | + | + | + | + |
| FLAG-ab | - | + | - | + |

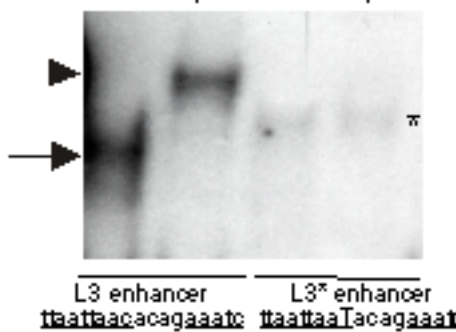

C

|         |   |   |   |   |   |   |
|---------|---|---|---|---|---|---|
| Mirr HD | - | + | + | - | + | + |
| FLAG-ab | - | - | + | - | - | + |

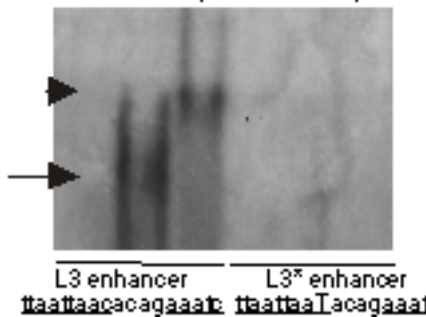

Supplement: pnas_0502480102_1.pdf [file pnas_0502480102_1.pdf]
